# Supplementary material for: An electrochemical sensor based on molecularly imprinted membranes on a P-ATP–AuNP modified electrode for the determination of acrylamide
Source: Royal Society of Chemistry journal article supplement (doi:10.1039/c4ay01286k), 2014-01-01

## Supporting materials

Fig. S1. SEM of gold modified GCE

Fig. S2. CV (A) and DPV (B) characterization of bare GCE and AuNP modified GCE.

Fig. S3. The hydrogen-bond interaction between acylamid and p-Aminothiophenol

Fig. 4S Evolution of the UV spectra with increasing amounts of PAM in 0.01 mmol L<sup>-1</sup> P-ATP solution

Fig. S5. The contact angle experiment of the P-ATP–AuNP/Au modified GCE modified GC

**Fig. S1**

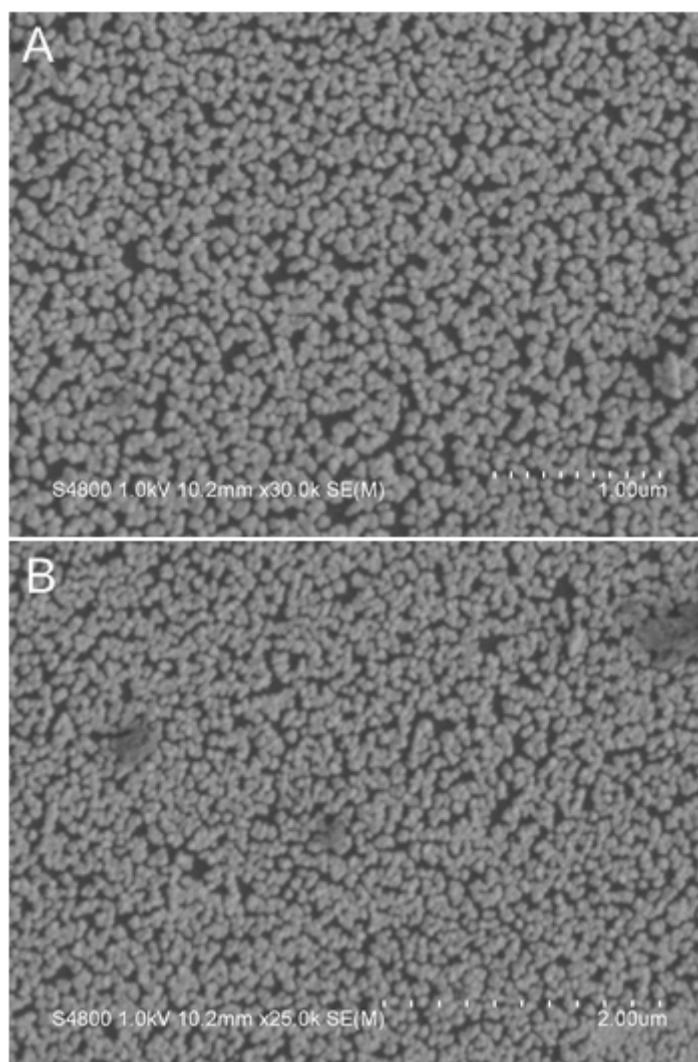

Fig. S2

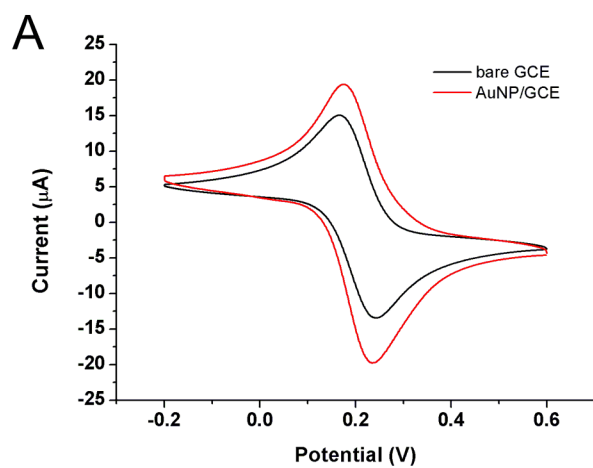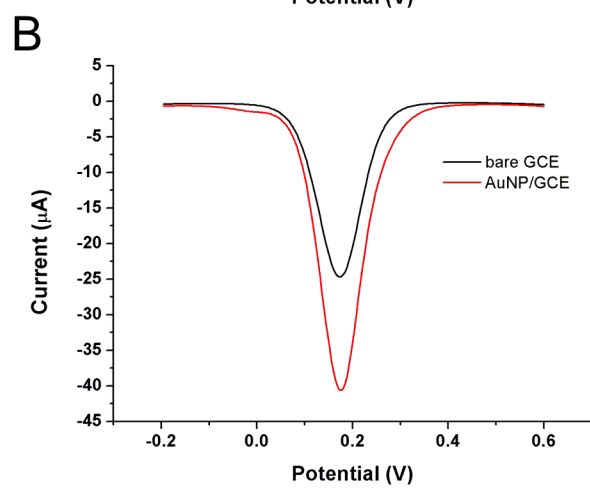

Fig.S3.

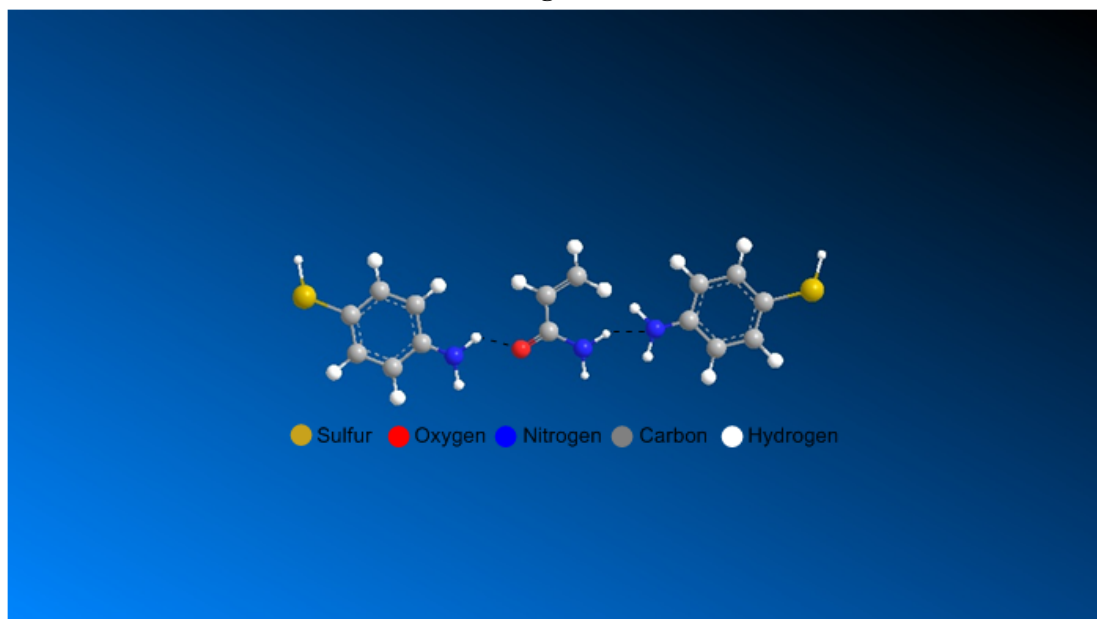

Fig. S4

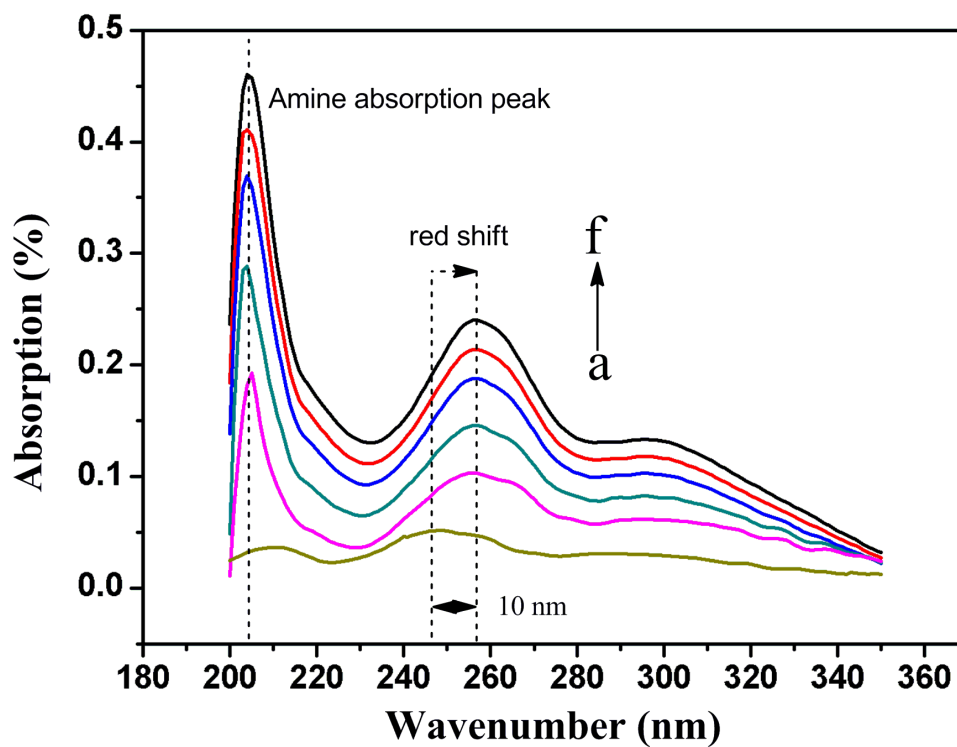

The intermolecular interaction between PAM and P-ATP was confirmed using UV absorbance spectra. The maximum absorption wavelength of P-ATP showed a red shift in the presence of PAM, and the maximum absorbance of P-ATP also increased upon the addition of PAM (Fig. S4). These suggest the formation of hydrogen bonding interactions between the amino groups ( $-\text{NH}_2$ ) of P-ATP and the oxygen atoms of ASA in the solution. Therefore, these strong hydrogen bonding interactions drive PAM molecular assembly on the surface of the P-ATP modified electrode, which increases the amount of imprinted sites on the electrode's surface and enhances the sensitivity of the electrode.

Fig. S5.

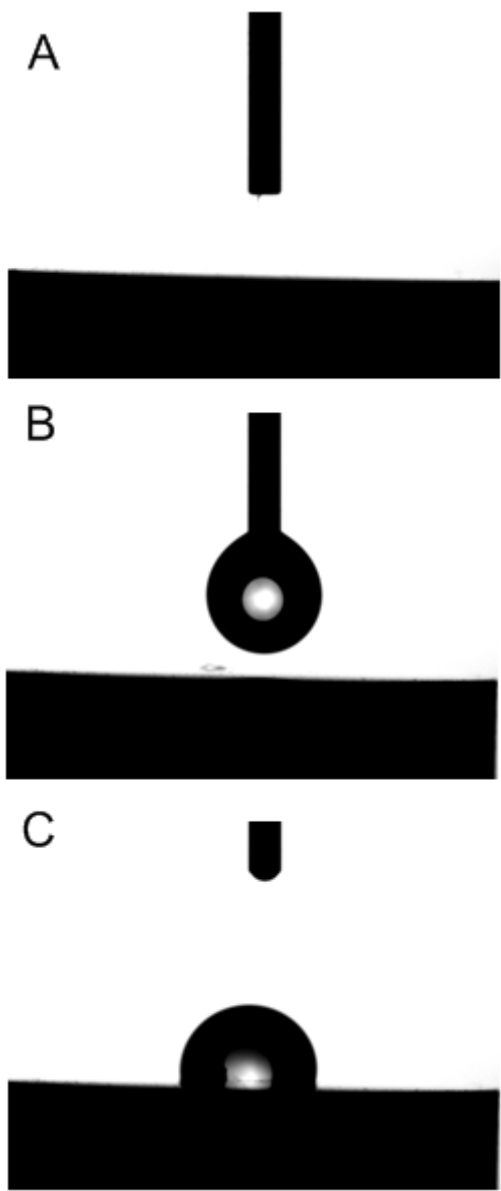

Supplement: c4ay01286k1.pdf [file c4ay01286k1.pdf]
